# Supplementary material for: Trade-off of major bleeding versus myocardial infarction on mortality after percutaneous coronary intervention
Source: HighWire-hosted journal article supplement (doi:10.1136/openhrt-2021-001861), 2022-01-01
Supplement: openhrt-2021-001861supp001_data_supplement.pdf [file openhrt-2021-001861supp001_data_supplement.pdf]

## Supplementary Appendix

### ENDPOINT DEFINITIONS

#### Death

Deaths is classified as cardiovascular or non-cardiovascular. The cause of death will be determined by the principal condition that resulted in the death, not the immediate mode of death. Managing physicians will utilize all available information provided, along with clinical expertise, in their adjudication of the cause of death.

#### Stroke

Stroke is defined as an acute episode of focal or global neurological dysfunction caused by cerebral vascular injury as a result of infarction or hemorrhage not caused by trauma. Ischemic stroke is defined as an acute episode of focal cerebral dysfunction caused by cerebral infarction. Hemorrhagic stroke is defined as an acute episode of focal or global cerebral dysfunction caused by intraparenchymal, intraventricular, or subarachnoid hemorrhage not caused by trauma. Subdural hematomas are intracranial hemorrhage events but not strokes.

#### Intracranial hemorrhage

Intracranial hemorrhage is defined as an acute or subacute episode of bleeding within the intracranial space, including hemorrhagic stroke, subdural hemorrhage and epidural hemorrhage.

#### Major bleeding

Major bleeding was defined as any episode of fatal bleeding event, bleeding that occurred in the critical sites (intracranial, intra-articular or intramuscular with compartment syndrome, intraocular, pericardial, retroperitoneal), bleeding necessitating transfusion, or bleeding that caused a drop in hemoglobin of  $\geq 2\text{g/dL}$ , in accordance to the International Society on Thrombosis and Haemostasis.

**BASELINE VARIABLES DEFINITIONS****Estimated glomerular filtration rate**

Estimated glomerular filtration rate (eGFR) is calculated based on MDRD equation, expressed as:

$$186 \times (\text{Creatinine}/88.4) - 1.154 \times (\text{Age}) - 0.203 \times (0.742 \text{ if female}) \times (1.210 \text{ if black})$$

where Creatinine is expressed in  $\mu\text{mol/L}$ .

**Anemia**

Anemia is defined as hemoglobin <13g/dL for men and hemoglobin <12g/dL for women.

## Tables

Table S1. Results of falsification analysis with pair-wise comparison

| Outcomes                | Neither   | MI only                  |         | MB only                  |         | Both                     |         |
|-------------------------|-----------|--------------------------|---------|--------------------------|---------|--------------------------|---------|
|                         |           | Hazard ratio<br>(95% CI) | P value | Hazard ratio<br>(95% CI) | P value | Hazard ratio<br>(95% CI) | P value |
| <b>Falsification</b>    |           |                          |         |                          |         |                          |         |
| New diagnosis of cancer | Reference | 1.10<br>(0.86 – 1.40)    | 0.451   | 0.84<br>(0.59 – 1.19)    | 0.321   | 1.55<br>(0.85 – 2.82)    | 0.154   |
|                         |           | Reference                |         | 0.76<br>(0.50 – 1.16)    | 0.201   | 1.41<br>(0.74 – 2.67)    | 0.293   |
|                         |           |                          |         | Reference                |         | 1.85<br>(0.93 – 3.66)    | 0.079   |

Table S2. Baseline characteristics of patients after 1:1 propensity score matching.

| Characteristics                                                 | MI only     | MB only     | P value | Standardized difference |
|-----------------------------------------------------------------|-------------|-------------|---------|-------------------------|
| <b>N</b>                                                        | 1118        | 1118        |         |                         |
| <b>Female sex</b>                                               | 341 (30.5%) | 351 (31.4%) | 0.65    | -0.019                  |
| <b>Age, mean (SD)</b>                                           | 68.1 (11.1) | 68.5 (11.1) | 0.41    | -0.035                  |
| <b>Age &gt;75</b>                                               | 694 (62.1%) | 718 (64.2%) | 0.29    |                         |
| <b>Tobacco use</b>                                              | 454 (40.6%) | 427 (38.2%) | 0.24    | 0.049                   |
| <b>Diabetes mellitus</b>                                        | 508 (45.4%) | 515 (46.1%) | 0.77    | -0.013                  |
| <b>Hypertension</b>                                             | 865 (77.4%) | 861 (77.0%) | 0.84    | 0.009                   |
| <b>Dyslipidemia</b>                                             | 700 (62.6%) | 686 (61.4%) | 0.54    | 0.026                   |
| <b>Cerebrovascular disease</b>                                  | 162 (14.5%) | 161 (14.4%) | 0.95    | 0.003                   |
| <b>Chronic obstructive pulmonary disease</b>                    | 39 (3.5%)   | 35 (3.1%)   | 0.64    | 0.020                   |
| <b>Peripheral artery disease</b>                                | 36 (3.2%)   | 40 (3.6%)   | 0.64    | -0.020                  |
| <b>Prior myocardial infarction</b>                              | 214 (19.1%) | 200 (17.9%) | 0.45    | 0.032                   |
| <b>Prior CABG</b>                                               | 21 (1.9%)   | 19 (1.7%)   | 0.75    | 0.013                   |
| <b>Congestive heart failure</b>                                 | 177 (15.8%) | 168 (15.0%) | 0.60    | 0.028                   |
| <b>Atrial fibrillation or flutter</b>                           | 94 (8.4%)   | 103 (9.2%)  | 0.50    | -0.028                  |
| <b>Chronic kidney disease (eGFR &lt;60ml/min/m<sup>2</sup>)</b> | 416 (37.2%) | 435 (38.9%) | 0.41    | -0.035                  |
| <b>Anemia at baseline*</b>                                      | 582 (52.1%) | 615 (55.0%) | 0.16    | -0.059                  |
| <b>History of cancer</b>                                        | 80 (7.2%)   | 102 (9.1%)  | 0.089   | -0.072                  |
| <b>Acute coronary syndrome</b>                                  | 916 (81.9%) | 898 (80.3%) | 0.33    | 0.041                   |
| <b>Number of epicardial arteries affected</b>                   |             |             | 0.45    | 0.052                   |
| <b>One vessel</b>                                               | 412 (36.9%) | 440 (39.4%) |         |                         |
| <b>Two vessels</b>                                              | 391 (35.0%) | 382 (34.2%) |         |                         |
| <b>Three vessels</b>                                            | 315 (28.2%) | 296 (26.5%) |         |                         |
| <b>Potent P2Y12 inhibitor on discharge#</b>                     | 96 (8.6%)   | 94 (8.4%)   | 0.88    | 0.006                   |
| <b>Anti-coagulation on discharge</b>                            | 57 (5.1%)   | 83 (7.4%)   | 0.023   | -0.096                  |

Table S3. Results of sensitivity analysis using multiple imputation with chained equations to handle missing variables.

| Outcomes                        | Neither   | MI only                  |         | MB only                  |         | Both                     |         |
|---------------------------------|-----------|--------------------------|---------|--------------------------|---------|--------------------------|---------|
|                                 |           | Hazard Ratio<br>(95% CI) | P Value | Hazard Ratio<br>(95% CI) | P Value | Hazard Ratio<br>(95% CI) | P Value |
| <b>Primary</b>                  |           |                          |         |                          |         |                          |         |
| <b>All-cause mortality</b>      | Reference | 1.64<br>(1.46 – 1.83)    | <0.001  | 2.13<br>(1.90 – 2.40)    | <0.001  | 2.89<br>(2.38 – 3.51)    | <0.001  |
|                                 |           | Reference                |         | 1.30<br>(1.12 – 1.52)    | 0.001   | 1.77<br>(1.43 – 2.19)    | <0.001  |
|                                 |           |                          |         | Reference                |         | 1.36<br>(1.10 – 1.68)    | 0.006   |
| <b>Secondary</b>                |           |                          |         |                          |         |                          |         |
| <b>Cardiovascular mortality</b> | Reference | 2.12<br>(1.76 – 2.55)    | <0.001  | 1.86<br>(1.48 – 2.32)    | <0.001  | 3.52<br>(2.59 – 4.78)    | <0.001  |
|                                 |           | Reference                |         | 0.87<br>(0.67 – 1.14)    | 0.330   | 1.66<br>(1.18 – 2.32)    | 0.003   |
|                                 |           |                          |         | Reference                |         | 1.89<br>(1.32 – 2.71)    | <0.001  |
